# Supplementary material
Source: PubMed Central journal article supplement (PMC4097716)

## **SUPPLEMENTAL MATERIALS AND METHODS**

**Performance of MALDI Biotyper system.** All the isolates were incubated on Trypticase soy agar with 5% sheep blood (BAP) (Becton-Dickinson Microbiology Systems, Sparks, MD, USA) and incubated for 24 hours at 37°C. Two to three colonies were transferred to 50 µl of 70% formic acid. After incubation for 30 seconds, 50 µl of acetonitrile (Sigma-Aldrich) was added. The suspension was then centrifuged at 13,000 rpm for 2 min. A volume of 1.0 µl of the supernatant was applied to a 96-spot polished steel target (Bruker Daltonik GmbH) plate and dried. A saturated solution of 1.0 µl of MALDI matrix (HCCA; Bruker Daltonik GmbH) was applied to each sample and dried. Measurements were performed with the MALDI Biotyper system using the FlexControl™ software with the Compass Flex Series version 1.3 software and a 60Hz nitrogen laser (337 nm wave length). Spectra were collected in the linear positive mode in a mass range covering 1,960 to 20,132 m/z. Spectra ranging from the mass-to-charge ratio (m/z) 2,000 to 20,000 were analyzed using the MALDI Biotyper system automation control and the Bruker BioTyper 3.1 software and library (DB 5627 with 5,627 entries). Identification scores of  $\geq 2.000$  indicated species-level identification, scores of 1.700 to 1.999 indicated genus-level identification, and scores of  $< 1.700$  indicated no reliable identification. The nine control strains, *A. aquariorum* MDC47<sup>T</sup>, *A. hydrophila* subsp. *dhakensis* LMG 19562, *A. hydrophila* ATCC 7966<sup>T</sup>, *A. veronii* biovar *sobria* ATCC 9071<sup>T</sup>, *A. caviae* ATCC 13136<sup>T</sup>, *A. hydrophila* BCRC 16704, *A. hydrophila* BCRC 13881, BCRC 17768 (*A. hydrophila* subsp. *ranae* Huys et al., 2003), and *A. bestiarum* ATCC 13444, were obtained from the Bioresource Collection and Research Center (BCRC), Hsinchu, Taiwan.

### **Species identification by *rpoB* sequencing**

As previously described, identification of *Aeromonas* species was based on the sequence analysis of the partial *rpoB* gene by PCR with the primers: PasrpoB-L (5'-GCAGTGAAAGARTTCTTTGGTTC-3') and RpoB-R (5'-GTTGCATGTTNGNACCCAT-3') (1). The sequences of the 560 base-pair amplified DNA products were compared with reference sequences available in the GenBank database using a BLAST search (<http://www.ncbi.nlm.nih.gov/BLAST/>). The isolates with an identity >99% for a type strain were considered to be the same species. The reference strains and their accession numbers for *rpoB* gene sequencing included *A. aquariorum* CECT 7289<sup>T</sup>/FJ481643.1, *A. hydrophila* ATCC 7966<sup>T</sup>/AY851091.1, *A. veronii* biovar *veronii* ATCC 35624<sup>T</sup>/AY851122.1, *A. punctata* V83/AY851107.1, *A. taiwanensis* A2-50<sup>T</sup>/JF 972599.1, and *A. sanarellii* A2-067<sup>T</sup>/JF972600.1. For this study, all these isolates were re-identified by using both commercially automated identification systems: Vitek 2 GN cards and Phoenix system (NMIC/ID-72 cards) (Becton-Dickinson Microbiology Systems) along with the MALDI Biotyper system. Furthermore, two additional biochemical tests, L-arabinose and Voges-Proskauer (VP) reactions were also performed to phenotypically differentiate three subspecies of *A. hydrophila*, i.e. *A. hydrophila* subsp. *dhakensis* (*A. dhakensis*), *A. hydrophila* subsp. *hydrophila* and *A. hydrophila* subsp. *ranae* (2). Isolates with positive reactions of both VP and L-arabinose were considered as *A. hydrophila* subsp. *hydrophila*. Isolates with negative reaction for both reactions were identified as *A. hydrophila* subsp. *ranae* (2). Isolates with positive reaction of VP but negative for L-arabinose were *A. dhakensis*.

#### SUPPLEMENTAL REFERENCES

1. Kupfer M, Kuhnert P, Korczak BM, Peduzzi R, Demarta A. 2006. Genetic relationships of *Aeromonas* strains inferred from 16S rRNA, *gyrB* and *rpoB* gene

sequences. *Int J Syst Evol Microbiol* **56**: 2743-2751.

2. **Beaz-Hidalgo R, Martinez-Murcia A, Figueras MJ.** 2013. Reclassification of *Aeromonas hydrophila* subsp. *dhakensis* Huys et al. 2002 and *Aeromonas aquariorum* Martinez-Murcia et al. 2008 as *Aeromonas dhakensis* sp. nov. comb nov. and emendation of the species *Aeromonas hydrophila*. *Syst Appl Microbiol* **36**: 171-176.

**SUPPLEMENTARY TABLE 1.** *In vitro* susceptibilities of the 217 clinical isolates of *Aeromonas* species to antimicrobial agents by Phoenix system (NMIC/ID-72 Combo cards).

| species/agents                | <i>A. dhakensis</i> (n=58) |          |               |      |      | <i>A. hydrophila</i> (n=35) |          |               |      |      | <i>A. veronii</i> (n=61) |          |               |      | <i>A. caviae</i> (n=61) |               |               |       |      |      |
|-------------------------------|----------------------------|----------|---------------|------|------|-----------------------------|----------|---------------|------|------|--------------------------|----------|---------------|------|-------------------------|---------------|---------------|-------|------|------|
|                               | MIC (µg/ml)                |          | % of isolates |      |      | MIC (µg/ml)                 |          | % of isolates |      |      | MIC (µg/ml)              |          | % of isolates |      | MIC (µg/ml)             |               | % of isolates |       |      |      |
|                               | range                      | 50%      | 90%           | S    | R    | range                       | 50%      | 90%           | S    | R    | range                    | 50%      | 90%           | S    | R                       | range         | 50%           | 90%   | S    | R    |
| Ampicillin/sulbactam          | >16/8                      | >16/8    | >16/8         | 0    | 100  | >16/8                       | >16/8    | >16/8         | 0    | 100  | 4/2->16/8                | >16/8    | >16/8         | 3.3  | 96.7                    | 8/4->16/8     | >16/8         | >16/8 | 1.6  | 98.4 |
| Cefazolin                     | 4->16                      | >16      | >16           |      |      | 4->16                       | >16      | >16           |      |      | 4->16                    | ≤4       | 4             |      |                         | 8->16         | >16           | >16   |      |      |
| Cefotaxime                    | 2->32                      | ≤2       | 4             |      |      | 2->16                       | ≤2       | >16           |      |      | 2                        | ≤2       | 2             |      |                         | 2->16         | ≤2            | >16   |      |      |
| Ceftriaxone                   | 4->32                      | ≤4       | 16            |      |      | 4->32                       | ≤4       | 32            |      |      | 4->32                    | ≤4       | 4             |      |                         | 4->32         | ≤4            | >32   |      |      |
| Ceftazidime                   | 0.5->16                    | ≤0.5     | 1             | 93.1 | 5.2  | 0.5->16                     | ≤0.5     | 4             | 91.4 | 8.6  | 0.5                      | ≤0.5     | 0.5           | 100  | 0                       | 0.5->16       | 1             | >16   | 72.1 | 19.7 |
| Cefepime                      | 2                          | ≤2       | 2             | 100  | 0    | 2->16                       | ≤2       | 2             | 94.3 | 5.7  | 2                        | ≤2       | 2             | 100  | 0                       | 2->16         | ≤2            | >16   | 83.6 | 14.8 |
| Piperacillin/tazobactam       | 4/4->64/4                  | ≤4/4     | 4/4           | 89.7 | 8.6  | ≤4/4                        | ≤4/4     | ≤4/4          | 100  | 0    | 4/4->64/4                | ≤4/4     | 4/4           | 98.4 | 1.6                     | 4/4->64/4     | ≤4/4          | 64/4  | 80.3 | 3.3  |
| Ertapenem                     | 0.5->4                     | ≤0.5     | >4            | 84.5 | 12.1 | 0.5-2                       | ≤0.5     | 0.5           | 100  | 0    | 0.5                      | ≤0.5     | 0.5           | 100  | 0                       | 0.5->4        | ≤0.5          | 0.5   | 91.8 | 6.6  |
| Imipenem                      | 1->8                       | ≤1       | 1             | 98.3 | 1.7  | 1                           | ≤1       | 1             | 100  | 0    | 1                        | ≤1       | 1             | 100  | 0                       | 1-4           | ≤1            | 1     | 98.4 | 1.6  |
| Meropenem                     | 1->8                       | ≤1       | 1             | 98.3 | 1.7  | 1                           | ≤1       | 1             | 100  | 0    | 1                        | ≤1       | 1             | 100  | 0                       | 1             | ≤1            | 1     | 100  | 0    |
| Aztreonam                     | 2-4                        | ≤2       | 2             | 100  | 0    | 2->16                       | ≤2       | 2             | 94.3 | 5.7  | 2                        | ≤2       | 2             | 100  | 0                       | 2->16         | ≤2            | 4     | 91.8 | 8.2  |
| Gentamicin                    | 2->8                       | 4        | 8             | 74.1 | 6.9  | 2->8                        | ≤2       | >8            | 88.6 | 11.4 | 2-8                      | ≤2       | 4             | 96.7 | 0                       | 2->8          | ≤2            | >8    | 82.0 | 13.1 |
| Amikacin                      | 8-32                       | 16       | 16            | 91.4 | 0    | 8->32                       | ≤8       | 8             | 94.3 | 5.7  | 8-16                     | ≤8       | 8             | 100  | 0                       | 8-32          | ≤8            | 8     | 98.4 | 0    |
| Levofloxacin                  | 1-2                        | ≤1       | 1             | 100  | 0    | 1->4                        | ≤1       | 1             | 97.1 | 2.9  | 1                        | ≤1       | 1             | 100  | 0                       | 1->4          | ≤1            | 4     | 86.9 | 8.2  |
| Ciprofloxacin                 | 0.5->2                     | ≤0.5     | 1             | 91.4 | 5.2  | 0.5->2                      | ≤0.5     | 2             | 85.7 | 8.6  | 0.5                      | ≤0.5     | 0.5           | 100  | 0                       | 0.5->2        | ≤0.5          | >2    | 78.7 | 16.4 |
| Trimethoprim/sulfamethoxazole | 0.5/9.5->2/38              | ≤0.5/9.5 | >2/38         | 81.0 | 19.0 | 0.5/9.5-1/19                | ≤0.5/9.5 | 1/19          | 100  | 0    | 0.5/9.5->2/38            | ≤0.5/9.5 | 0.5/9.5       | 91.8 | 8.2                     | 0.5/9.5->2/38 | ≤0.5/9.5      | >2/38 | 75.4 | 24.6 |

S, susceptible; R, resistant.

**SUPPLEMENTARY FIGURE 1.** Spectra generated by MALDI Biotyper system for *A. dhakensis*, *A. caviae*, *A. veronii*, *A. hydrophila* subsp. *hydrophila*, *A. sanarellii*, and *A. taiwanesis*.

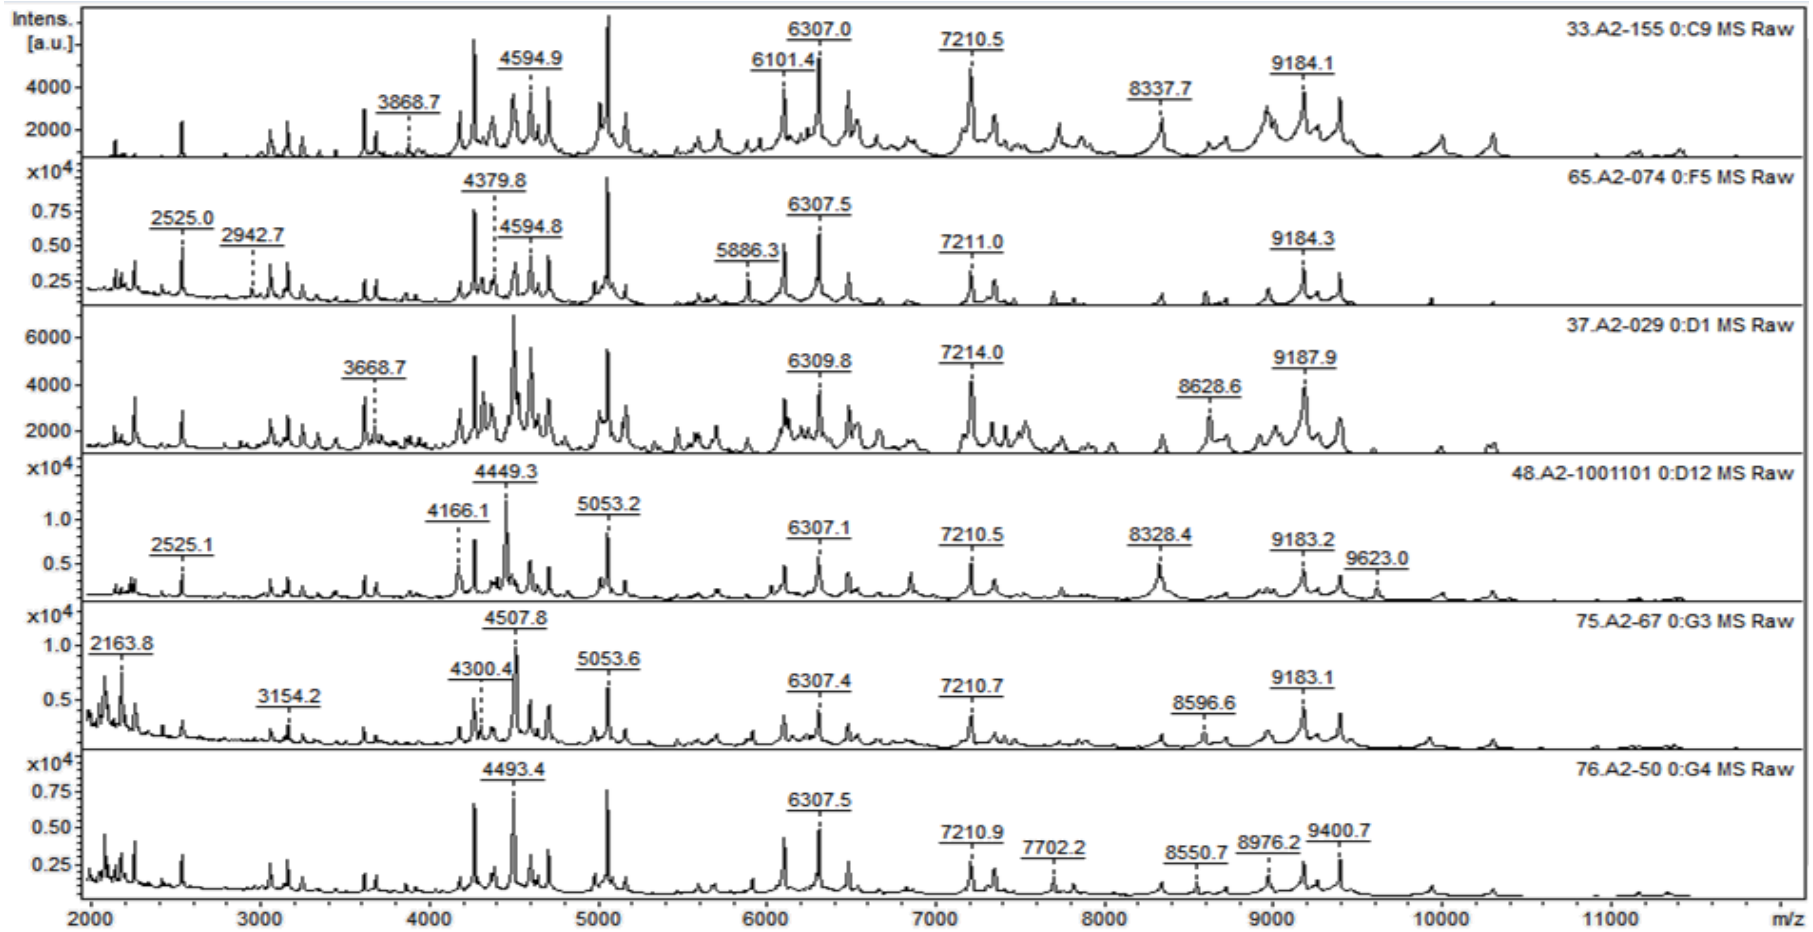

Supplement: JCM.01025-14_zjm999093495so1.pdf [file JCM.01025-14_zjm999093495so1.pdf]
